# Supplementary material
Source: PubMed Central journal article supplement (PMC7966732)
Supplement: NIHMS1674687-supplement-2.pdf [file NIHMS1674687-supplement-2.pdf]

## Dual trajectories of physical activity and blood lipids in midlife women: The Study of Women's Health Across the Nation

### Supplemental Material

Supplemental Table 1. Comparison of sociodemographic and medical characteristics of SWAN participants at baseline in women included vs excluded from the final analysis

|                                                             | <b>Included<br/>(n=2789)</b> | <b>Excluded<br/>(n=513)</b> |
|-------------------------------------------------------------|------------------------------|-----------------------------|
| Age (years), mean (SD)                                      | 45.9 (2.7)                   | 45.8 (2.8)                  |
| Sports/exercise physical activity index score, mean (SD)    | 2.7 (1.0)                    | 2.2 (0.9)                   |
| Sports/exercise physical activity index score, median (IQR) | 2.5 (1.8)                    | 2.0 (1.3)                   |
| Missing, n                                                  | 69                           | 21                          |
| Race/ethnicity, n (%)                                       |                              |                             |
| Hispanic                                                    | 0 (0)                        | 286 (56)                    |
| Non-Hispanic white                                          | 1375 (49)                    | 176 (34)                    |
| Black                                                       | 894 (32)                     | 40 (8)                      |
| Japanese                                                    | 274 (10)                     | 7 (1)                       |
| Chinese                                                     | 246 (9)                      | 4 (1)                       |
| Education, n (%)                                            |                              |                             |
| Less than high school                                       | 100 (4)                      | 138 (28)                    |
| High school graduate                                        | 469 (17)                     | 112 (22)                    |
| Some college/technical school                               | 922 (33)                     | 129 (26)                    |
| College graduate                                            | 597 (22)                     | 64 (13)                     |
| Post graduate education                                     | 685 (25)                     | 55 (11)                     |
| Missing                                                     | 16                           | 15                          |
| BMI category, n (%)                                         |                              |                             |
| Underweight (<18.5 kg/m <sup>2</sup> )                      | 47 (2)                       | 5 (1)                       |
| Normal weight (18.5-24.9 kg/m <sup>2</sup> )                | 1021 (37)                    | 138 (29)                    |
| Overweight (25-29.9 kg/m <sup>2</sup> )                     | 777 (28)                     | 157 (33)                    |
| Obese (≥30 kg/m <sup>2</sup> )                              | 944 (34)                     | 171 (36)                    |
| Missing                                                     | 0                            | 42                          |
| Menopausal status, n (%)                                    |                              |                             |
| Pre-menopause                                               | 1505 (54)                    | 256 (54)                    |
| Early perimenopause                                         | 1284 (46)                    | 209 (44)                    |
| Unknown/hormone therapy                                     | 0 (0)                        | 6 (1)                       |
| Missing                                                     | 0                            | 42                          |
| Alcohol use, n (%)                                          |                              |                             |
| None                                                        | 1323 (50)                    | 230 (47)                    |
| <1/week                                                     | 263 (10)                     | 63 (13)                     |
| 1-7/week                                                    | 656 (25)                     | 157 (32)                    |
| >7/week                                                     | 405 (15)                     | 36 (7)                      |
| Missing                                                     | 142                          | 27                          |
| Smoking status, n (%)                                       |                              |                             |
| Never                                                       | 1586 (57)                    | 304 (59)                    |
| Former                                                      | 722 (26)                     | 108 (21)                    |
| Current                                                     | 481 (17)                     | 99 (19)                     |
| Missing                                                     | 0                            | 2                           |

\*Using Asian-specific BMI cutoffs for Chinese and Japanese women

## Dual trajectories of physical activity and blood lipids in midlife women: The Study of Women's Health Across the Nation

Supplemental Material

Supplemental Table 2. Measures of final trajectory model fit

| <b>Final trajectory group</b> | <b>Mean posterior membership probability</b> | <b>Odds of correct classification</b> |
|-------------------------------|----------------------------------------------|---------------------------------------|
| Physical activity             |                                              |                                       |
| Consistently low              | 0.91                                         | 5                                     |
| Increasing                    | 0.74                                         | 15                                    |
| Decreasing                    | 0.70                                         | 56                                    |
| Consistently high             | 0.78                                         | 26                                    |
| HDL cholesterol               |                                              |                                       |
| Low                           | 0.94                                         | 21                                    |
| Moderate                      | 0.93                                         | 19                                    |
| High                          | 0.95                                         | 100                                   |
| LDL cholesterol               |                                              |                                       |
| Low-increasing                | 0.90                                         | 41                                    |
| Consistently moderate         | 0.87                                         | 8                                     |
| Moderate-decreasing           | 0.88                                         | 16                                    |
| High-decreasing               | 0.91                                         | 158                                   |
| Triglycerides                 |                                              |                                       |
| Consistently low              | 0.99                                         | 11                                    |
| High-decreasing               | 0.95                                         | 171                                   |
